# Supplementary material for: The Space From Heart Disease Intervention for People With Cardiovascular Disease and Distress: A Mixed-Methods Study
Source: PubMed Central journal article supplement (PMC4526970; doi:10.2196/resprot.4280), 2015-07-01
Supplement: resprot_v4i3e81_app1.pdf [file resprot_v4i3e81_app1.pdf]

## **Appendix A: Topic Guide**

**Development, Feasibility and Acceptability of the 'Space from Heart Disease' Intervention for people Cardiovascular Disease and Distress: a mixed methods study.**

### **Welcome & Introductions:**

- The reason we are here is to discuss problems with having a heart-related disease and what would help you to manage better.
- We are developing an online resource to help people with heart-related diseases, we will show you an example online resource and will ask your opinions on it.
- You were selected because you have told us that you have a heart-related disease.

### **Guidelines:**

- No right or wrong answers, only differing points of view
- We're tape recording, one person speaking at a time
- We're on a first name basis here but when we write up the report we will ensure that your identities remain confidential
- You don't need to agree with others, but you must listen respectfully as others share their views
- We ask that you turn off your phones for the duration of the session. If you cannot and if you must respond to a call please do so as quietly as possible and rejoin us as quickly as you can.
- My role as moderator will be to guide the discussion, please talk to each other

### **Topics**

Some people with heart-related diseases say they have chest pain or palpitations, fatigue and or breathlessness and that their condition makes them feel stressed.

- Do you, or anyone you know, have experience of any of these?
- How do these make you feel?
- How do you or anyone you know, cope with these things?

You may be aware that being overweight, drinking too much and not exercising can be bad for heart disease.

- What helps or hinders you from having a healthy lifestyle?

Many people with heart-related diseases have to take a lot of medications

- Do you, or anyone you know, have problems with taking medications?

### **Demonstration of SilverCloud example intervention**

We would now like to show you an example of the kind of online resource we would like to develop. This one is about depression; the one we develop will be specific to heart-related diseases.

Run through application and ask for comments on each element: (prompts – more/less required; language ok, any changes?)

Video

Quiz

Information pages etc

Do you think a similar resource more focused on heart-related diseases would be useful to you?

### **Demonstration of Managing CVD and CVD distress modules (printed copies)**

These are examples of the kinds of heart related material which will be online – please read, any comments?

Is there anything you can think of which we should include in the resource that we haven't already covered?

### **Personal stories**

Finally, we will be illustrating the programme using examples from these people's personal stories. Please let us know what you think of each one.

**Thank you very much for your thoughts, ideas and reflections**
